# Supplementary material
Source: Springer Nature journal article supplement (https://www.springermedizin.de/resource/supplementary/13045_2008_42_MOESM4_ESM.pdf/9660534)

**A.** Detection of the Oct-1 transcription factor precipitated by the immunoprecipitation (IP) from the K562 cell lysates of different treatments.

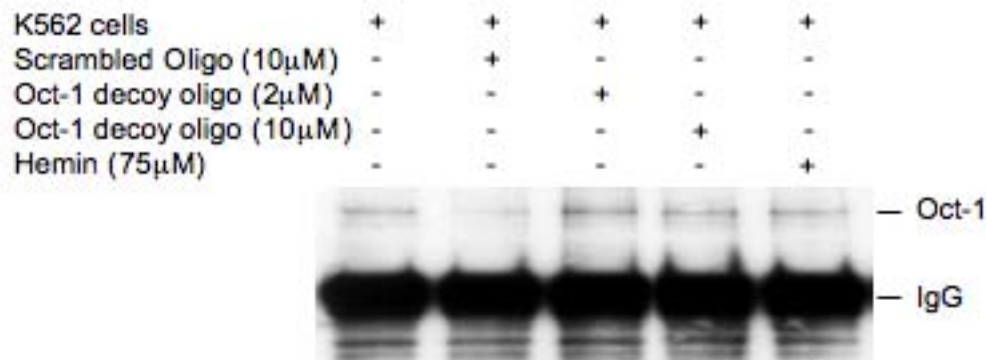

**B.** Quantification of the  $\gamma$ -globin gene promoter DNA precipitated by the IP protocol from the K562 cell lysates of different treatments.

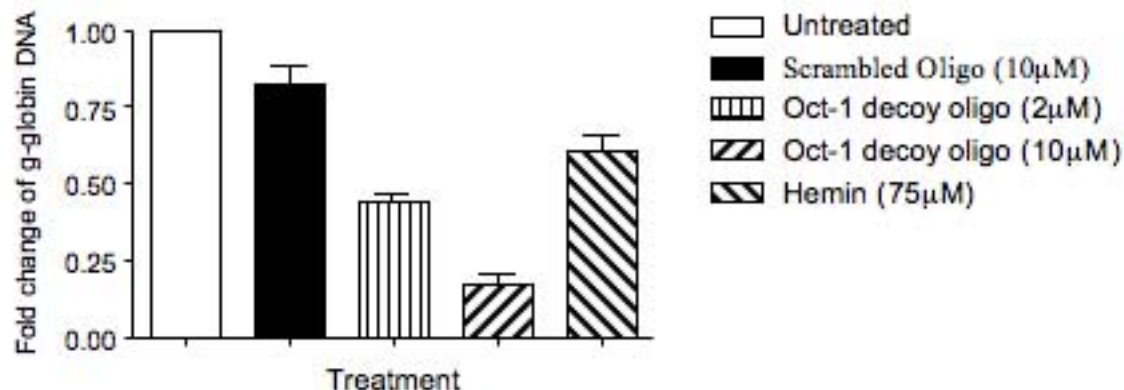

Supplement: MOESM4 [file 9660534]
